# Supplementary material for: Ligand influences on homoleptic Group 12 m-terphenyl complexes
Source: Royal Society of Chemistry journal article supplement (doi:10.1039/c4dt00647j), 2014-01-01
Supplement: c4dt00647j1.pdf [file c4dt00647j1.pdf]

## Supporting Information for:

### **Ligand Influences on Homoleptic Group 12 *m*-Terphenyl Complexes**

Toby J. Blundell, Fiona R. Hastings, Benjamin M. Gridley, Graeme J. Moxey,<sup>‡</sup> William Lewis, Alexander J. Blake and Deborah L. Kays\*

School of Chemistry, University of Nottingham, University Park, Nottingham,  
NG7 2RD, United Kingdom

<sup>‡</sup> Current address: Research School of Chemistry, Australian National University,  
Canberra, ACT 0200, Australia.

### **Contents**

- Page 2: Molecular Structures of 2,6-Ar<sub>2</sub>C<sub>6</sub>H<sub>3</sub>I [Ar = 2,6-Me<sub>2</sub>C<sub>6</sub>H<sub>3</sub> (2,6-Xyl); 3,5-Me<sub>2</sub>C<sub>6</sub>H<sub>3</sub> (3,5-Xyl); 2,3,4,5,6-Me<sub>5</sub>C<sub>6</sub> (Pmp)].
- Page 3: Molecular Structure of [2,6-(3,5-Xyl)<sub>2</sub>C<sub>6</sub>H<sub>3</sub>Li]<sub>2</sub>.
- Page 4: Crystallographic Data.
- Page 5: References.

**Molecular Structures of 2,6-Ar<sub>2</sub>C<sub>6</sub>H<sub>3</sub>I [Ar = 2,6-Me<sub>2</sub>C<sub>6</sub>H<sub>3</sub> (2,6-Xyl); 3,5-Me<sub>2</sub>C<sub>6</sub>H<sub>3</sub> (3,5-Xyl); 2,3,4,5,6-Me<sub>5</sub>C<sub>6</sub> (Pmp)]**

The *m*-terphenyl iodides 2,6-Ar<sub>2</sub>C<sub>6</sub>H<sub>3</sub>I (Ar = 2,6-Xyl, 3,5-Xyl, Pmp)<sup>S1-S3</sup> were synthesised *via* modification of the ‘one-pot’ methodology reported by Hart *et al.*<sup>S1</sup> Pure crystalline samples of these compounds were obtained from saturated ethanol solutions at room temperature.

The crystal structures of 2,6-Ar<sub>2</sub>C<sub>6</sub>H<sub>3</sub>I, along with relevant bond lengths and angles can be found in Fig. S1.

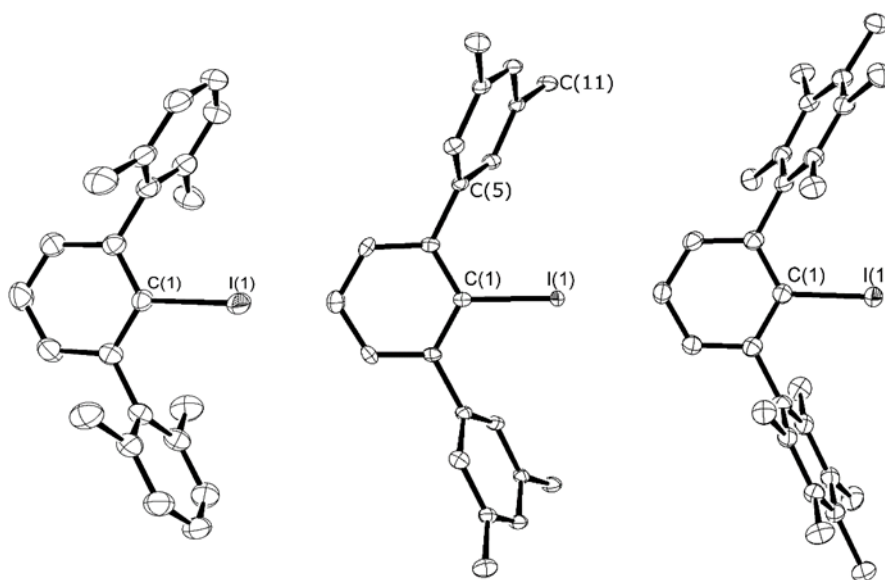

**Fig. S1** Molecular structures of 2,6-Ar<sub>2</sub>C<sub>6</sub>H<sub>3</sub>I (Ar = 2,6-Xyl, 3,5-Xyl, Pmp), with displacement ellipsoids set at the 50% probability level. Hydrogen atoms are omitted for clarity. Relevant bond lengths (Å) and angles (°) for 2,6-(2,6-Xyl)<sub>2</sub>C<sub>6</sub>H<sub>3</sub>I: C(1)–I(1) 2.106(4), ∠*ortho*-aryl-C<sub>6</sub>H<sub>3</sub> rings 89.62(9), for 2,6-(3,5-Xyl)<sub>2</sub>C<sub>6</sub>H<sub>3</sub>I: C(1)–I(1) 2.097(7), H(11A)⋯C(5) centroid = 2.752(2), C(11)⋯C(5) centroid = 3.699(6), I(1)⋯C(1) centroid = 3.776(3), ∠*ortho*-aryl-C<sub>6</sub>H<sub>3</sub> rings 65.7(2), ∠C(11)–H(11A)⋯C(5) centroid = 162.48(3), ∠C(1)–I(1)⋯C(1) centroid = 121.94(18), and for 2,6-(Pmp)<sub>2</sub>C<sub>6</sub>H<sub>3</sub>I: C(1)–I(1) 2.102(2), C(18) ring centroid⋯C(18) ring centroid = 4.3, ∠*ortho*-aryl-C<sub>6</sub>H<sub>3</sub> rings 72.48(6), 78.98(8).

### Molecular Structure of [2,6-(3,5-Xyl)<sub>2</sub>C<sub>6</sub>H<sub>3</sub>Li]<sub>2</sub>

The lithium complex [2,6-(3,5-Xyl)<sub>2</sub>C<sub>6</sub>H<sub>3</sub>Li]<sub>2</sub> was prepared by reaction of the iodide with <sup>n</sup>BuLi, according to literature methods.<sup>S4</sup> Single crystals of [2,6-(3,5-Xyl)<sub>2</sub>C<sub>6</sub>H<sub>3</sub>Li]<sub>2</sub> suitable for X-ray diffraction were obtained from storage of a saturated hexane solution of the complex at room temperature.

The crystal structure of [2,6-(3,5-Xyl)<sub>2</sub>C<sub>6</sub>H<sub>3</sub>Li]<sub>2</sub>, consists of two crystallographically independent molecules, and is shown in Fig. S2, along with relevant bond lengths and angles. The structures of both of these molecules consist of dimeric [2,6-(3,5-Xyl)<sub>2</sub>C<sub>6</sub>H<sub>3</sub>Li]<sub>2</sub> units with no crystallographically-imposed symmetry, which is unlike that found for the solid state structures of the pentamethylphenyl-substituted *m*-terphenyl lithiate [2,6-Pmp<sub>2</sub>C<sub>6</sub>H<sub>3</sub>Li]<sub>2</sub><sup>S2</sup> and the phenoxy ether complex [2,6-(PhO)<sub>2</sub>C<sub>6</sub>H<sub>3</sub>Li(OEt<sub>2</sub>)]<sub>2</sub>.<sup>S5</sup>

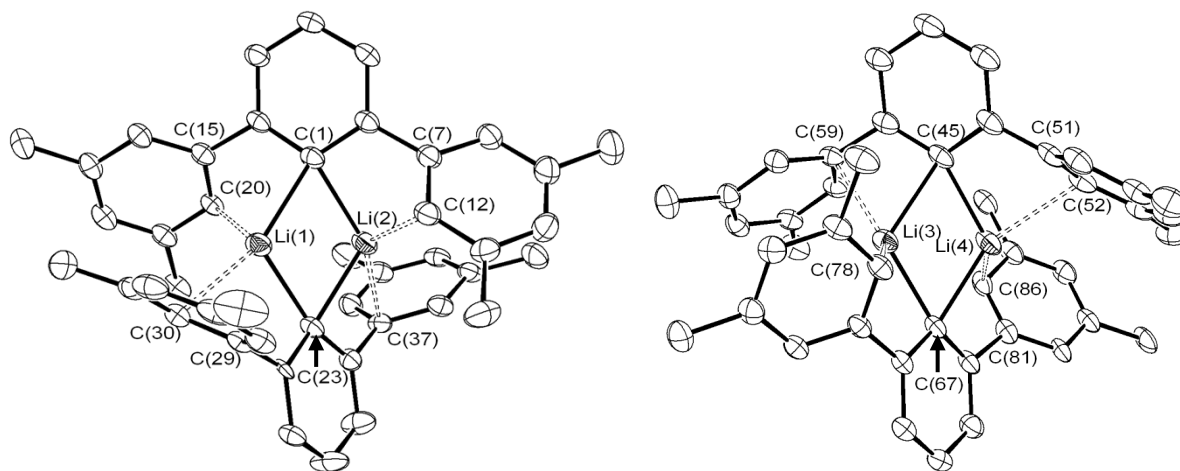

**Fig. S2** Molecular structure of both crystallographically independent molecules of [2,6-(3,5-Xyl)<sub>2</sub>C<sub>6</sub>H<sub>3</sub>Li]<sub>2</sub>, with displacement ellipsoids set at the 40% probability level. Dashed lines indicate short C···Li distances. Hydrogen atoms and minor disorder components of the C(23)-C(28) and C(81)-C(86) rings are omitted for clarity. Relevant bond lengths (Å) and angles (°): Li(1)–C(1) = 2.170(6), Li(2)–C(1) = 2.177(6), Li(1)–C(23) = 2.12(2), Li(2)–C(23) = 2.14(2), Li(3)–C(45) = 2.190(6),

Li(4)–C(45) = 2.166(7), Li(3)–C(67) = 2.152(6), Li(4)–C(67) = 2.190(6),  
 Li(1)⋯Li(2) = 2.322(8), Li(3)⋯Li(4) = 2.316(8), Li(1)–C(1)–Li(2) = 64.6(2),  
 Li(1)–C(23)–Li(2) = 66.1(6), Li(1)–C(23A)–Li(2) = 62.8(6), Li(3)–C(45)–Li(4) =  
 64.4(2), Li(3)–C(67)–Li(4) = 64.5(2).

**Table S1** Crystallographic data.

|                                                                           | 2,6-(2,6-<br>Xyl) <sub>2</sub> C <sub>6</sub> H <sub>3</sub> I | 2,6-(3,5-<br>Xyl) <sub>2</sub> C <sub>6</sub> H <sub>3</sub> I | 2,6-(Pmp) <sub>2</sub> C <sub>6</sub> H <sub>3</sub> I | [2,6-(3,5-<br>Xyl) <sub>2</sub> C <sub>6</sub> H <sub>3</sub> Li] <sub>2</sub> |
|---------------------------------------------------------------------------|----------------------------------------------------------------|----------------------------------------------------------------|--------------------------------------------------------|--------------------------------------------------------------------------------|
| Formula                                                                   | C <sub>22</sub> H <sub>21</sub> I                              | C <sub>22</sub> H <sub>21</sub> I                              | C <sub>28</sub> H <sub>33</sub> I                      | C <sub>44</sub> H <sub>42</sub> Li <sub>2</sub>                                |
| <i>M<sub>w</sub></i>                                                      | 412.29                                                         | 412.29                                                         | 496.44                                                 | 584.65                                                                         |
| Crystal system                                                            | Monoclinic                                                     | Orthorhombic                                                   | Triclinic                                              | Monoclinic                                                                     |
| Space Group                                                               | <i>C2/c</i>                                                    | <i>Pnma</i>                                                    | <i>P-1</i>                                             | <i>P2<sub>1</sub>/n</i>                                                        |
| Crystal size/mm                                                           | 0.35 × 0.17 × 0.08                                             | 0.61 × 0.35 × 0.15                                             | 0.65 × 0.45 × 0.23                                     | 0.34 × 0.23 × 0.12                                                             |
| <i>a</i> (Å)                                                              | 14.2219(8)                                                     | 7.759(2)                                                       | 8.708(2)                                               | 10.6871(3)                                                                     |
| <i>b</i> (Å)                                                              | 8.8418(8)                                                      | 27.311(8)                                                      | 9.292(3)                                               | 42.4827(9)                                                                     |
| <i>c</i> (Å)                                                              | 16.0675(13)                                                    | 8.450(2)                                                       | 15.373(4)                                              | 15.9595(4)                                                                     |
| <i>α</i> (°)                                                              | 90                                                             | 90                                                             | 73.294(4)                                              | 90                                                                             |
| <i>β</i> (°)                                                              | 112.897(7)                                                     | 90                                                             | 77.896(4)                                              | 106.596(3)                                                                     |
| <i>γ</i> (°)                                                              | 90                                                             | 90                                                             | 77.855(4)                                              | 90                                                                             |
| <i>V</i> (Å <sup>3</sup> )                                                | 1861.2(3)                                                      | 1790.6(9)                                                      | 1149.9(5)                                              | 6944.0(3)                                                                      |
| <i>Z</i>                                                                  | 4                                                              | 4                                                              | 2                                                      | 8                                                                              |
| <i>T</i> (K)                                                              | 90(2)                                                          | 90(2)                                                          | 90(2)                                                  | 120(2)                                                                         |
| <i>D<sub>calc</sub></i> (g cm <sup>-3</sup> )                             | 1.471                                                          | 1.529                                                          | 1.434                                                  | 1.118                                                                          |
| <i>F<sub>000</sub></i>                                                    | 824                                                            | 824                                                            | 508                                                    | 2496                                                                           |
| <i>μ</i> (mm <sup>-1</sup> )                                              | 1.718                                                          | 1.786                                                          | 1.404                                                  | 0.460                                                                          |
| <i>θ</i> range for data collection (°)                                    | 2.75–27.26                                                     | 2.98–25.03                                                     | 2.32–27.38                                             | 3.07–66.60                                                                     |
| Max. and min. transmission                                                | 0.430 and 0.356                                                | 0.397 and 0.309                                                | 0.746 and 0.540                                        | 1.212 and 0.987                                                                |
| reflns measd                                                              | 8903                                                           | 7411                                                           | 9719                                                   | 30836                                                                          |
| independent reflns                                                        | 2084                                                           | 1610                                                           | 5041                                                   | 12192                                                                          |
| <i>R<sub>int</sub></i>                                                    | 0.0363                                                         | 0.0281                                                         | 0.0256                                                 | 0.0342                                                                         |
| Final <i>Goof</i>                                                         | 1.10                                                           | 1.50                                                           | 1.07                                                   | 1.12                                                                           |
| <i>R<sub>1</sub></i> , <i>wR<sub>2</sub></i> [ <i>I</i> > 2σ( <i>I</i> )] | 0.0318, 0.0739                                                 | 0.0412, 0.102                                                  | 0.0329, 0.0891                                         | 0.0745, 0.182                                                                  |
| <i>R<sub>1</sub></i> , <i>wR<sub>2</sub></i> (all data)                   | 0.0371, 0.0758                                                 | 0.0417, 0.102                                                  | 0.0336, 0.0900                                         | 0.0862, 0.186                                                                  |
| min. and max. electron densities (e Å <sup>-3</sup> )                     | –0.70, 0.71                                                    | –2.63, 1.61                                                    | –1.46, 1.61                                            | –0.28, 0.28                                                                    |

**References**

- S1. A. Saednya and H. Hart, *Synthesis*, 1996, 1455.
- S2. S. Hino, M. M. Olmstead, J. C. Fettinger and P. P. Power, *J. Organomet. Chem.*, 2005, **690**, 1638.
- S3. S. Duttwyler, Q.-Q. Do, A. Linden, K. K. Baldrige and J. S. Siegel, *Angew. Chem. Int. Ed.*, 2008, **47**, 1719.
- S4. R. J. Wehmschulte, A. A. Diaz, and M. A. Khan, *Organometallics*, 2003, **22**, 83.
- S5. A. J. Blake, A. L. Gower, W. Lewis, G. J. Moxey, T. J. Reade and D. L. Kays, *J. Organomet. Chem.*, 2011, **696**, 1787.
